# Supplementary material
Source: PubMed Central journal article supplement (PMC3271001)

Supplementary Data  
for

# An Amyloid Organelle: Solid State NMR Evidence for Cross-Beta Assembly of Gas Vesicles

by  
Marvin J. Bayro, Eugenio Daviso, Marina Belenky, Robert G. Griffin, Judith Herzfeld

Figure S1. PAR spectrum with a 10 ms mixing period.

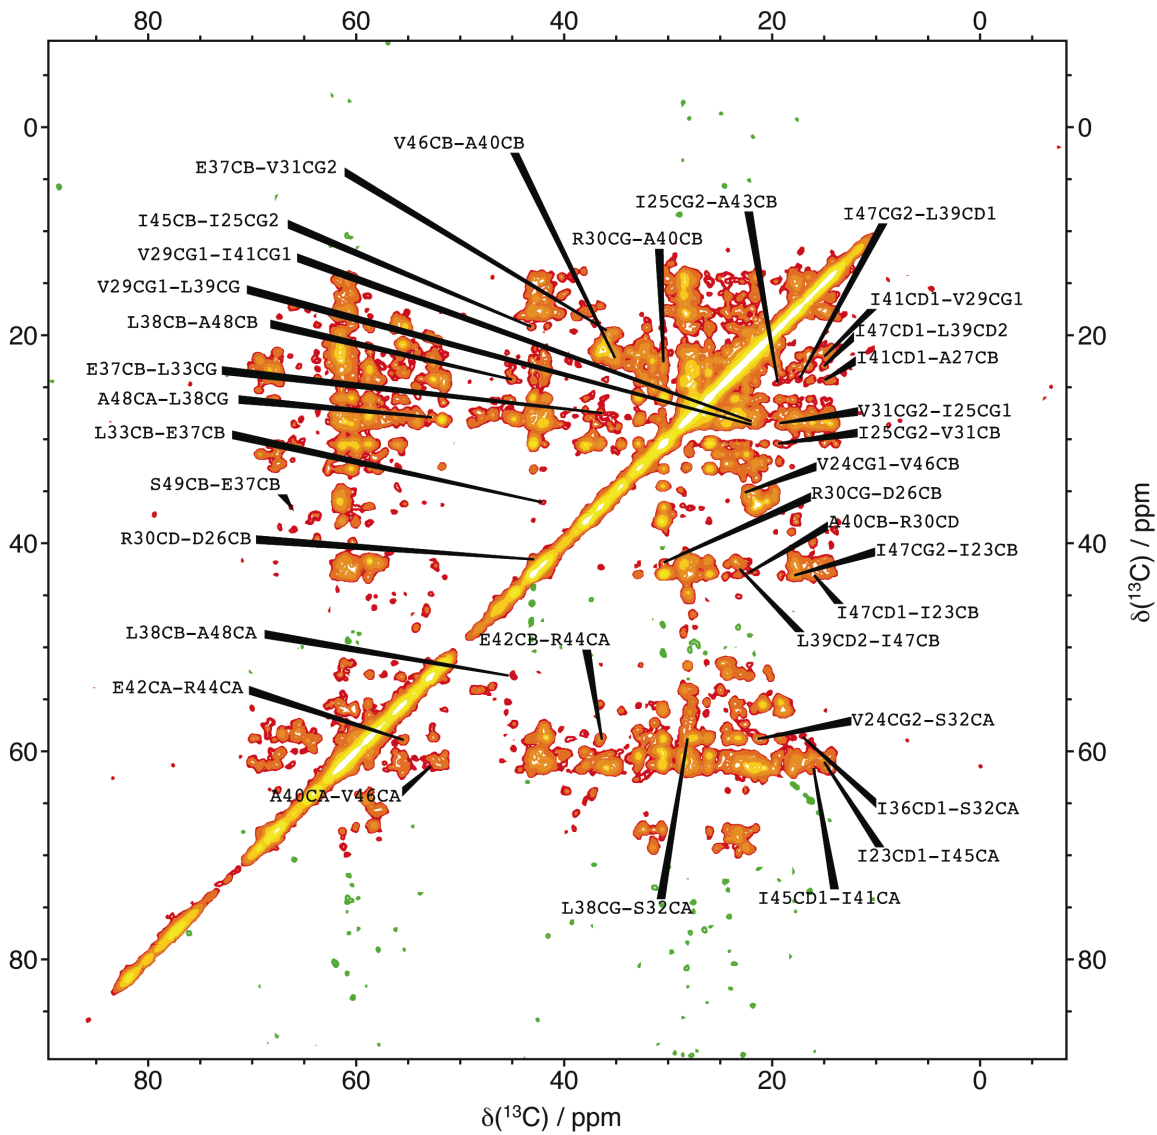

Figure S2. DARR spectrum with a 250 ms mixing period.

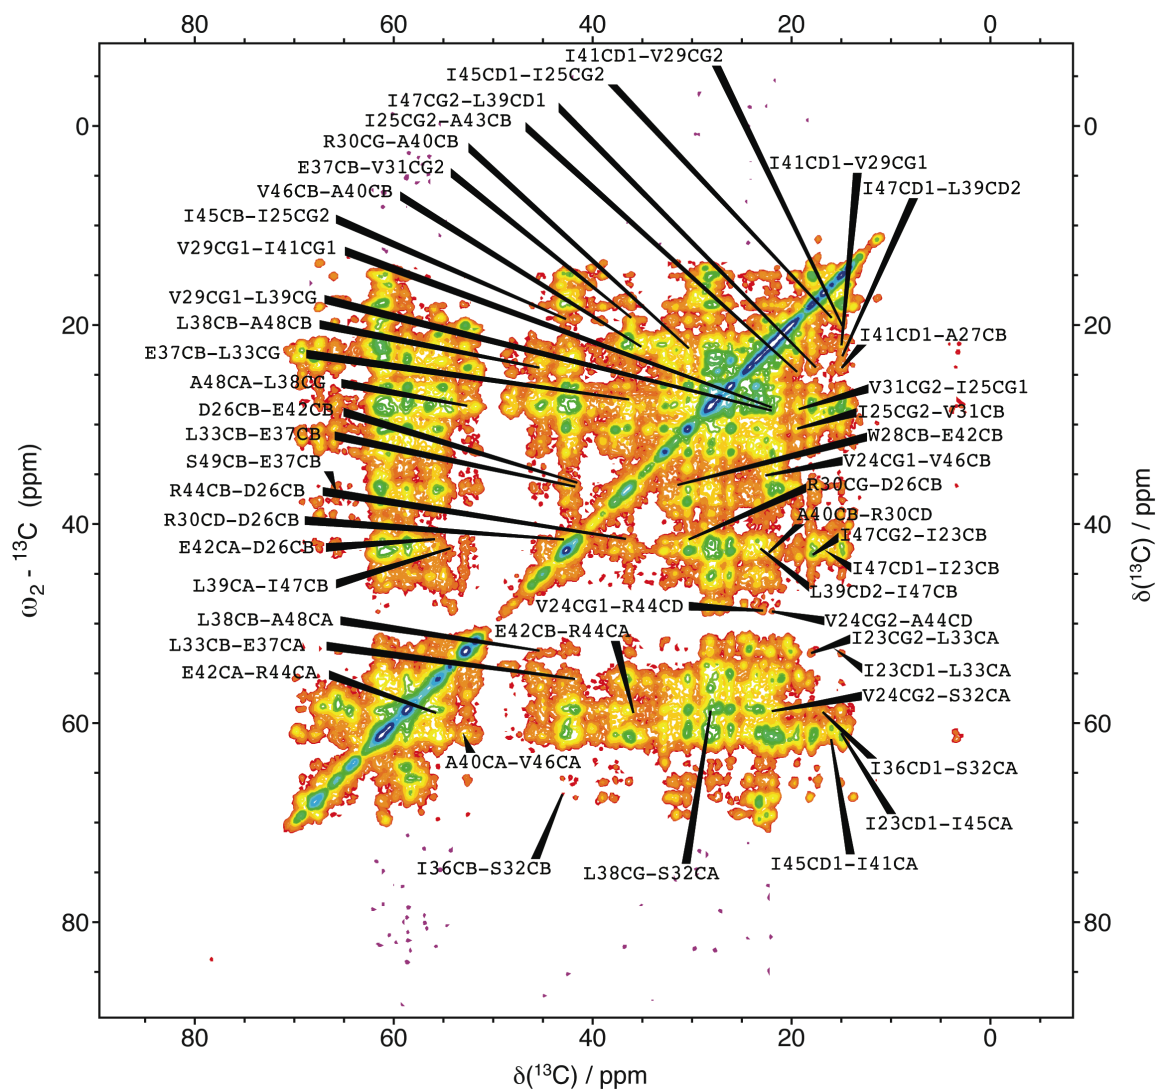

Supplement: supp_M111.313049_jbc.M111.313049-1.pdf [file supp_M111.313049_jbc.M111.313049-1.pdf]
